# Supplementary material
Source: publisher figshare collection journal article supplement (https://acs.figshare.com/ndownloader/files/3744253)
Supplement: Supplementary file 1 [file 3744253]

# Lanthanide-dipicolinic Acid Coordination Driven Micelles with Enhanced Stability and Tunable Function

Junyou Wang,<sup>a</sup> R. H. Marleen de Kool,<sup>a</sup> Aldrik H. Velders<sup>a,b,\*</sup>

*(a) Laboratory of BioNanoTechnology, Wageningen University, Dreijenplein 6, 6703 HB Wageningen, The Netherlands*

*(b) Interventional Molecular Imaging Laboratory, Department of Radiology, Leiden University Medical Centre, Leiden, The Netherlands.*

\*To whom correspondence should be addressed:

E-mail: [aldrik.velders@wur.nl](mailto:aldrik.velders@wur.nl)

This PDF file includes:

1. CONTIN analysis of micellar size and size distribution , Figure S1.
2. TEM image of the Eu(III) incorporated micelles, Figure S2.

Figure S1

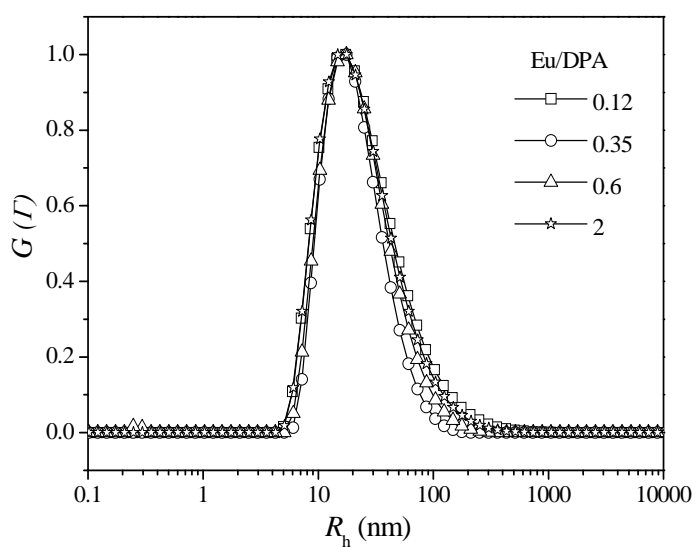

Figure S1 CONTIN analysis of micellar size and size distribution at different Eu/DPA mixing ratio.

Figure S2

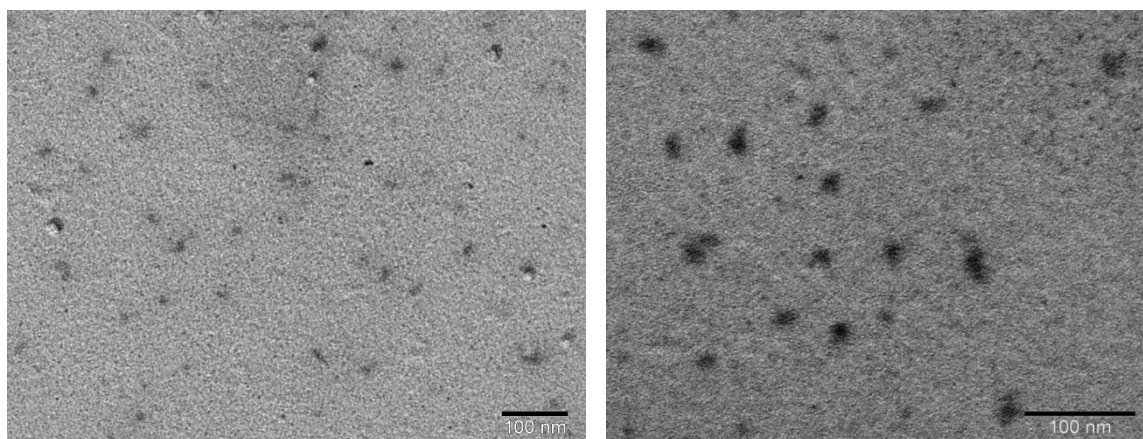

Figure S2 TEM image of the Eu-BP micelles prepared at a Eu/DPA ratio of 1/3. The dots only present the micellar core as the PEO corona provides insufficient contrast to be visible.
